# Supplementary material
Source: PubMed Central journal article supplement (PMC5408311)
Supplement: NIHMS855609-supplement-1.pdf [file NIHMS855609-supplement-1.pdf]

1 **Supplementary Note**

2  
3 **Accurate identification of single nucleotide variants in whole genome amplified**  
4 **single cells**

5  
6 Xiao Dong<sup>1\*</sup>, Lei Zhang<sup>1\*</sup>, Brandon Milholland<sup>1\*</sup>, Moonsook Lee<sup>1</sup>, Alexander Y. Maslov<sup>1</sup>,  
7 Tao Wang<sup>2</sup> and Jan Vijg<sup>1,3</sup>

8  
9 <sup>1</sup>Department of Genetics, <sup>2</sup>Department of Epidemiology & Population Health,  
10 <sup>3</sup>Department of Ophthalmology & Visual Sciences, Albert Einstein College of Medicine.

11  
12 \*These authors contributed equally to this work.

13 Correspondence should be addressed to Jan Vijg (jan.vijg@einstein.yu.edu).

14  
15  
16 **Library preparation and whole-genome sequencing**

17 For the 8 single cells and the kindred clone, 2 µg of DNA from each sample was sheared  
18 using Covaris sonication to an average size of 600 bp. Then we performed size-selection  
19 ranging from 500 bp to 800 bp on a 1% agarose gel. The size-selected DNA was purified  
20 using the MinElute Gel Extraction Kit (Qiagen). We transferred 300 ng of purified DNA to  
21 a 0.2-ml PCR tube. PCR-free libraries were constructed following manuals of Accel-NGS  
22 2S DNA Library Kit (Swift Biosciences). Bead-based SPRI cleanups were used to remove  
23 oligonucleotides and small fragments after each step in the library construction. The  
24 resulting functional libraries were quantified using the KAPA Library Quantification Kit  
25 (KAPA Biosystems). Paired-end sequencing (2×250bp) was performed on HiSeq 2500  
26 sequencers (Illumina) at the Epigenomics Core Albert Einstein College of Medicine. For  
27 the bulk cell population, genomic DNA was extracted from the same human fibroblast  
28 population as the single cells using DNeasy Blood & Tissue Kit (Qiagen). One µg of  
29 purified genomic DNA was fragmented by Covaris sonication to a size of ~400 bp and a  
30 PCR-free whole-genome sequencing library was constructed using the KAPA LTP Library  
31 Preparation Kit (KAPA Biosystems) with Truseq adapters (Illumina) at the Epigenomics  
32 Core of the Albert Einstein College of Medicine. Paired-end sequencing (2×100 bp) was  
33 performed on HiSeq 2500 sequencers (Illumina) at the Epigenomics Core of the Albert  
34 Einstein College of Medicine. For clones C1, C2 and C3, DNA was extracted from the  
35 clone cultures, each grown from a single cell. Library construction and sequencing were  
36 performed on the HiSeq X Ten at the New York Genome Center, New York, NY.

37  
38 **Quantitative PCR for estimation of amplification uniformity**

39 Single cell amplicons, positive and negative controls, and empty Rafts were tested for  
40 uniform amplification at 8 separate loci<sup>1,2</sup> (Supplementary Table 2) using real-time PCR  
41 (RT-PCR). The 10-µl reaction included 2 ng DNA as template, 1 µM forward primer, 1 µM

42 reversed primer and 5 µl Fast Sybr Green master mix (Applied Biosystems). Relative  
43 abundance of each locus was calculated as,

44 
$$\text{Relative uniformity value (RUV)} = 2^{-(Ct_i - Ct_0)} \quad (1)$$

45 Where,  $Ct_i$  denotes the  $Ct$  value of the locus in sample  $i$ , and  $Ct_0$  denotes the  $Ct$  value of  
46 the same locus in the unamplified genomic DNA. RUV of unamplified genomic DNA  
47 should be 1. An RUV closer to 1 indicates a more uniform amplification of the locus.  
48 Primers used for RT-PCR are listed in Supplementary Table 2. RUVs of each locus from  
49 single cell amplicons, positive and negative control, and empty Rafts (Methods) are listed  
50 in Supplementary Table 1. This test provides a quick and rough estimate of amplification  
51 uniformity across the genome. Currently, we consider RUVs of 6 out of the 8 loci in a  
52 range of 0.25-4 as satisfactory and 66% of amplicons from single cells are within this  
53 range (Supplementary Table 1).

54

### 55 **Sanger sequencing**

56 To confirm that somatic SNVs called by SCcaller were present in the single cell amplicons,  
57 but not in the bulk DNA, we performed Sanger sequencing on 16 randomly selected  
58 variants of the kindred group (Supplementary Table 5). This was done in the kindred cells  
59 and clone, as well as the bulk, even for SNVs identified in only one cell. All the somatic  
60 SNVs selected were confirmed by Sanger sequencing. Of note, the Sanger sequencing  
61 can only confirm whether the mutation is in the amplicon, but cannot rule out the  
62 possibility that the mutation is the result of an amplification error. We took advantage of  
63 the kindred design to distinguish real SNVs and amplification errors (Fig. 1 a, b).

64

### 65 **Assessing sequencing uniformity**

66 To assess sequencing uniformity of the bulk, as well as the clone and single cell samples  
67 amplified using SCMDA and HighTemp MDA, we split the genome into 1kb  
68 non-overlapping windows. For each window, we calculated the number of reads  
69 (mapQ≥20) aligned to it using bedtools (v2.24.0). We used the read counts per window to  
70 plot Lorenz curves of the read numbers using the R package “ineq” (Supplementary Fig.  
71 4).

72

### 73 **Using other variant callers**

74 For HaploTYPEcaller, we used the options -stand\_call\_conf 30 -stand\_emit\_conf 10 as  
75 recommended by its developers.

76 For MuTect<sup>3</sup>, (version 1.1.7), we input single cell or clone data as the tumor  
77 (--input\_file:tumor) and bulk cell population data as the normal (--input\_file:normal). The  
78 dbSNP (build 138) data was also used as input to MuTect (--dbsnp). Candidate somatic  
79 SNVs overlapping with dbSNP (build 144), located on sex chromosomes or with  
80 sequencing depth less than 20 were discarded.

81 For VarScan<sup>4</sup>, (version 2.3.8), we first mpileup single cells and bulk data using  
82 samtools. The somatic command for VarScan, with the default settings, was used for

83 calling somatic SNVs from each single cell or clone against the bulk with a minimum  
84 sequencing depth of 20. Candidate somatic SNVs reported by VarScan overlapping with  
85 dbSNP (build 144), located on sex chromosomes or with variant reads in the bulk were  
86 discarded.

87 For Monovar<sup>5</sup>, we first mpileuped the single cell data using samtools (-BQ0 -d10000  
88 -f referencegenome.fa -q 40, as recommended) and then called SNVs (-p 0.002 -a 0.2 -t  
89 0.05, as recommended). Somatic SNVs were identified as not present in the bulk, not  
90 overlapping with dbSNP (build 144), located on autosomes, and with a sequencing depth  
91 equal or more than 20.

92

### 93 **Calling somatic SNVs from clones**

94 We used three software tools, MuTect<sup>3</sup>, VarScan<sup>4</sup> and Unifiedgenotyper<sup>6</sup>, as described  
95 above, to call somatic SNVs from the clones using the bulk cell population as control, and  
96 took the intersection of the three call sets; these we considered to be high-quality somatic  
97 SNV calls and we reported them in the main text (Fig. 3). This strategy of taking the  
98 intersection is a common practice, for example, in the 1000 Genomes Project<sup>7</sup>.

99

### 100 **Determining true mutations and amplification artifacts**

101 For our kindred cells and clone, TPs and FPs were determined as follows. For each  
102 germline SNP detected by a variant caller in a kindred cell (Fig. 2a,b), we calculated the  
103 variant read counts in the kindred clone, the other kindred cell and the bulk (mapQ $\geq$ 40).  
104 When the three numbers were all  $\geq$  1, we assigned the germline SNP call as a TP, and  
105 when all equal to 0, it was assigned as a FP. For each somatic SNV called by a variant  
106 caller in a kindred cell (Fig. 2d,e), we calculated the number of variant reads in the  
107 kindred clone (mapQ $\geq$ 40). When at least 4 reads in the clone, a threshold based on  
108 commonly used criteria for calling mutations from a single dataset<sup>4</sup>, we considered it to be  
109 a TP, and when there was 0 variant-supporting read in the clone, a FP. This assignment  
110 left some somatic SNVs with an unknown TP/FP status. We approximated the proportion  
111 of TPs and FPs with an unknown TP/FP status as that of the SNVs with clear TP/FP  
112 status described above.

113 For public single cell sequencing data, TPs and FPs were determined as follows. For  
114 germline SNP calling (Fig. 2c), SNPs presented in dbSNP and covered in bulk (minimum  
115 4 variant supporting reads), were considered as germline SNPs. The number of false  
116 positives was approximated as the number of SNVs not present in dbSNP and not  
117 present in bulk (minimum 1 variant supporting read). This is because according to Hazen  
118 et al.<sup>8</sup> the real somatic SNVs in this cell type is about a hundred per cell and we detected  
119 1,000 to 30,000 depending on the variant caller applied, so the vast majority of these  
120 variant calls are FPs. For somatic SNV calling (Fig. 2f), SNVs called by a variant caller in  
121 one kindred cell and also present in the other two kindred single cells (minimum 1 variant  
122 supporting read) in the MALBAC dataset<sup>9</sup>, were considered as overlapping somatic SNV  
123 calls in all kindred cells.

124

### 125 **Estimating the number of somatic SNVs per cell**

126 To estimate the number of somatic SNVs per cell, we adjusted the raw number of somatic  
127 SNVs for sequencing depth and coverage. To do this, we divided the raw number of  
128 somatic SNVs by the number of base pairs in the genome with sequencing depth  $\geq 20$  in  
129 both a single cell and its bulk (Supplementary Table 3), and multiplied by the total number  
130 of bases in the genome.

131

### 132 **Somatic SNV distribution across genomic features**

133 Gene annotations were downloaded from the Ensembl Biomart (hg19). DNase I  
134 hypersensitive peaks and TF peaks were generated by ENCODE projects and  
135 downloaded from the UCSC genome browser. Repeat annotations were downloaded  
136 from the RepeatMasker website (<http://www.repeatmasker.org>). Germline variants were  
137 downloaded from the 1000 Genomes Project  
138 (<ftp://ftp.1000genomes.ebi.ac.uk/vol1/ftp/release/20130502/>).

139 We used bedtools (v2.24.0) to annotate somatic SNVs on the above genomic  
140 features. Level of enrichment of SNVs on a genomic region was presented as the ratio  
141 between observed number of somatic SNVs and the expected number from  
142 genome-wide average after adjusting sequencing depth and coverage (Supplementary  
143 Fig. 10a).

144

### 145 **Somatic SNVs in expressed genes**

146 Transcriptome data were taken from the ENCODE projects under experiment IDs  
147 ENCFF640FPG and ENCFF704TVE  
148 (<https://www.encodeproject.org/experiments/ENCSR797BPP/>), which correspond to  
149 human dermal fibroblasts, the same cell type we used. The data include FPKM values for  
150 genes.

151 To test whether mutation frequency in exomes correlate with gene expression level  
152 we performed a permutation test as follows (Supplementary Fig. 10b). We sampled a  
153 random gene set with the same number of genes harboring somatic SNVs and calculated  
154 the average FPKM value for the random gene set. The sampling was repeated 2,000  
155 times, and this generated 2,000 average FPKM values of random gene sets (the solid  
156 black line in Supplementary Fig. 10b). The average FPKM value of the mutant gene set  
157 was also calculated and compared to these 2,000 average FPKM values. The  $P$  value  
158 was estimated as,

159

$$P = \frac{N_{le} + 1}{N_{run} + 1} \quad (2)$$

160 where  $N_{le}$  denotes the number of random gene sets with a smaller or equal average  
161 FPKM compared to the mutant, and  $N_{run}$  denotes the number of permutations, i.e., 2000  
162 in this test.

163

**Supplementary Table 1.** Quantitative PCR at 8 loci for SCMDA amplicons of single human dermal fibroblasts.

| Sample      | Type                | Yield $\mu$ g | Relative uniformity value (Supplementary Information) |       |       |       |       |       |       |       |
|-------------|---------------------|---------------|-------------------------------------------------------|-------|-------|-------|-------|-------|-------|-------|
|             |                     |               | site1                                                 | site2 | site3 | site4 | site5 | site6 | site7 | site8 |
| h1          | Single cell         | 14.4          | 1.11                                                  | 0.14  | 1.01  | 0.38  | 0.19  | 1.31  | 0.28  | 0.50  |
| h2          | Single cell         | 15.2          | 1.02                                                  | 0.25  | 0.09  | 0.53  | 0.70  | 0.60  | 0.15  | 0.38  |
| h3          | Single cell         | 17.2          | 1.68                                                  | 0.21  | 1.17  | 0.06  | 0.28  | 0.76  | 0.49  | 0.66  |
| h4          | Single cell         | 17.5          | 0.69                                                  | 0.11  | 0.73  | 0.12  | 0.34  | 0.72  | 0.57  | 0.52  |
| h5          | Single cell         | 14.6          | 10.04                                                 | 0.04  | 0.01  | 0.32  | 0.02  | 0.02  | 0.01  | 0.03  |
| h6          | Single cell         | 16.4          | 0.84                                                  | 0.36  | 0.91  | 0.18  | 0.33  | 0.99  | 0.27  | 0.63  |
| h7          | Single cell         | 16.4          | 0.53                                                  | 0.16  | 0.98  | 0.28  | 0.29  | 0.31  | 0.16  | 0.34  |
| h8          | Single cell         | 17.0          | 1.05                                                  | 0.14  | 1.20  | 0.39  | 0.47  | 0.88  | 0.35  | 0.58  |
| h9          | Single cell         | 15.2          | 1.31                                                  | 0.25  | 1.14  | 0.33  | 0.17  | 0.75  | 0.22  | 0.63  |
| h10         | Single cell         | 15.6          | 0.95                                                  | 0.23  | 0.90  | 0.54  | 0.51  | 0.60  | 0.36  | 1.19  |
| h11         | Single cell         | 16.4          | 1.09                                                  | 0.22  | 1.81  | 0.41  | 0.47  | 1.16  | 0.39  | 0.77  |
| h12         | Single cell         | 16.2          | 0.50                                                  | 0.17  | 0.25  | 0.33  | 0.24  | 0.52  | 0.16  | 0.85  |
| h13         | Single cell         | 14.8          | 1.08                                                  | 0.33  | 1.24  | 0.32  | 0.51  | 0.58  | 0.40  | 0.60  |
| h14         | Single cell         | 16.7          | 0.62                                                  | 0.21  | 0.57  | 0.18  | 0.25  | 0.89  | 0.28  | 0.60  |
| h15         | Single cell         | 14.8          | 1.59                                                  | 0.33  | 1.50  | 0.21  | 0.68  | 1.24  | 0.32  | 1.03  |
| h16         | Single cell         | 16.4          | 0.41                                                  | 0.21  | 0.00  | 0.37  | 0.01  | 0.41  | 0.17  | 0.32  |
| h17         | Single cell         | 13.8          | 0.73                                                  | 0.15  | 1.47  | 0.38  | 0.51  | 0.61  | 0.25  | 0.27  |
| h18         | Single cell         | 13.4          | 0.28                                                  | 0.06  | 0.40  | 0.21  | 0.43  | 0.63  | 0.21  | 0.21  |
| h19         | Single cell         | 15.5          | 0.28                                                  | 0.06  | 8.94  | 0.13  | 0.01  | 0.02  | 0.00  | 0.09  |
| h20         | Single cell         | 12.7          | 1.89                                                  | 0.24  | 0.57  | 0.34  | 0.80  | 0.88  | 0.50  | 0.93  |
| h21         | Single cell         | 13.0          | 0.78                                                  | 0.08  | 0.01  | 0.45  | 0.18  | 1.24  | 0.02  | 0.19  |
| h22         | Single cell         | 12.7          | 1.43                                                  | 0.11  | 0.51  | 0.78  | 0.68  | 0.36  | 0.13  | 0.54  |
| h23         | Single cell         | 13.1          | 1.41                                                  | 0.39  | 0.88  | 0.62  | 0.68  | 1.21  | 0.36  | 0.90  |
| h24         | Single cell         | 12.8          | 1.28                                                  | 0.87  | 0.75  | 0.96  | 0.40  | 3.53  | 0.32  | 0.84  |
| h25         | Single cell         | 12.2          | 0.99                                                  | 0.20  | 0.74  | 0.24  | 0.39  | 0.31  | 0.05  | 0.41  |
| h26         | Single cell         | 13.2          | 0.02                                                  | 0.33  | 1.58  | 0.69  | 0.52  | 0.76  | 0.27  | 1.41  |
| h27         | Single cell         | 12.8          | 1.44                                                  | 0.05  | 0.00  | 0.57  | 0.01  | 0.01  | 0.49  | 1.21  |
| h28         | Single cell         | 14.4          | 0.48                                                  | 0.27  | 0.90  | 0.09  | 0.15  | 0.57  | 0.19  | 0.81  |
| h29         | Single cell         | 13.9          | 0.81                                                  | 0.39  | 0.58  | 0.51  | 0.42  | 1.17  | 0.46  | 0.77  |
| h30         | Single cell         | 14.2          | 0.95                                                  | 0.22  | 0.97  | 0.71  | 0.24  | 1.64  | 0.35  | 0.66  |
| h31         | Single cell         | 14.4          | 0.65                                                  | 0.15  | 1.78  | 0.42  | 0.44  | 0.78  | 0.37  | 1.04  |
| h32         | Single cell         | 13.6          | 0.93                                                  | 0.36  | 0.42  | 0.30  | 0.45  | 0.91  | 0.19  | 0.96  |
| h33         | Single cell         | 14.3          | 0.75                                                  | 0.20  | 1.02  | 0.32  | 0.48  | 0.61  | 0.47  | 1.02  |
| h34         | Single cell         | 13.7          | 0.58                                                  | 0.33  | 1.90  | 0.45  | 0.39  | 2.27  | 0.36  | 0.44  |
| h35         | Single cell         | 14.3          | 2.24                                                  | 0.33  | 5.16  | 0.44  | 0.40  | 1.69  | 0.51  | 1.20  |
| h36         | Single cell         | 14.2          | 0.98                                                  | 0.08  | 0.02  | 0.01  | 0.24  | 0.91  | 0.76  | 0.22  |
| h37         | Single cell         | 13.7          | 1.35                                                  | 0.31  | 1.75  | 0.67  | 0.33  | 1.11  | 0.36  | 0.42  |
| h38         | Single cell         | 12.4          | 1.10                                                  | 0.04  | 0.00  | 0.28  | 0.00  | 4.01  | 0.22  | 0.34  |
| h39         | Single cell         | 12.1          | 0.47                                                  | 0.53  | 0.00  | 0.09  | 0.05  | 0.23  | 0.05  | 0.11  |
| h40         | Single cell         | 12.2          | 0.81                                                  | 0.25  | 0.19  | 0.51  | 0.16  | 0.21  | 0.35  | 0.52  |
| h41         | Single cell         | 12.2          | 0.66                                                  | 0.09  | 2.16  | 0.47  | 0.64  | 0.83  | 0.13  | 0.50  |
| h42         | Single cell         | 11.9          | 0.39                                                  | 0.40  | 0.09  | 0.14  | 0.86  | 0.23  | 0.19  | 0.59  |
| h43         | Single cell         | 12.1          | 0.45                                                  | 0.27  | 0.00  | 0.95  | 0.50  | 0.45  | 0.11  | 0.03  |
| h44         | Single cell         | 11.5          | 0.70                                                  | 0.06  | 0.75  | 1.20  | 0.48  | 1.52  | 0.06  | 0.34  |
| empty raft1 | Empty raft*         | 1.0           | 0.00                                                  | 0.00  | 0.01  | 0.00  | 0.01  | 0.03  | 0.00  | 0.00  |
| empty raft2 | Empty raft          | 1.1           | 0.00                                                  | 0.00  | 0.01  | 0.00  | 0.01  | 0.03  | 0.00  | 0.00  |
| empty raft3 | Empty raft          | 0.9           | 0.00                                                  | 0.00  | 0.01  | 0.00  | 0.01  | 0.04  | 0.00  | 0.00  |
| empty raft4 | Empty raft          | 1.0           | 0.00                                                  | 0.00  | 0.01  | 0.00  | 0.01  | 0.04  | 0.00  | 0.00  |
| pc1         | Positive control**  | 12.6          | 1.70                                                  | 0.52  | 0.93  | 0.61  | 0.48  | 1.25  | 0.65  | 0.66  |
| pc2         | Positive control    | 11.5          | 1.16                                                  | 0.27  | 1.04  | 0.71  | 0.40  | 0.95  | 0.31  | 0.43  |
| nc1         | Negative control*** | 0.6           | 0.00                                                  | 0.00  | 0.01  | 0.00  | 0.02  | 0.07  | 0.00  | 0.00  |

\* Empty rafts had no cells on it.

\*\* 1 ng of human genomic DNA in 2.5  $\mu$ l PBS was amplified as a positive control.\*\*\* 2.5  $\mu$ l of PBS without any template was amplified as a negative control.

**Supplementary Table 2.** Primers for qPCR of the 8 loci.

| Species | Chr | Forward                  | Reverse                   |
|---------|-----|--------------------------|---------------------------|
| human   | 1p  | TTTGATGGAGAAATCCGAGG     | CTGACTCGGAGAGCAGGAC       |
| human   | 1q  | GGTAGGATGATTCTAGAATGCCA  | GCCCAAATTGGCTTCTTTTT      |
| human   | 4p  | AACTGAATGGCAGTGAAAACA    | CCCTAGCCTGTCATTGCTG       |
| human   | 4q  | TATAGCCACCTGACCCAAG      | CTGTCATCACTGTCTACTTCCTCTC |
| human   | 10p | GTTCTGCTGCCTCTACACAGG    | ATCCTTCTGTGAACTCTCAAATCC  |
| human   | 10q | CTTCCTGACCTGTTTGCAGT     | CTTCAGTGCACAGAATGCAG      |
| human   | 12p | CCACACACTCTGGTTTTATAAAGC | TTTTTCTCCTGCATCCATGG      |
| human   | 12q | TCCTCATTGTTGGGGATGAT     | TGGCCAAAATAGAAGCCAT       |

**Supplementary Table 3.** Coverage statistics and sequencing depth (mapQ $\geq$ 20).

| Sample id    | Type              | Protocol     | Average depth | % genome   |            |           |       |
|--------------|-------------------|--------------|---------------|------------|------------|-----------|-------|
|              |                   |              |               | $\geq 20x$ | $\geq 10x$ | $\geq 5x$ | at 0x |
| IL11         | kindred cell      | SCMDA        | 26.5          | 54.9%      | 78.9%      | 87.3%     | 9.3%  |
| IL12         | kindred cell      | SCMDA        | 26.9          | 49.3%      | 70.0%      | 80.9%     | 11.0% |
| IL1C         | kindred clone     | -            | 31.6          | 82.6%      | 90.1%      | 90.9%     | 8.7%  |
| IL2          | single cell       | SCMDA        | 26.3          | 57.7%      | 82.3%      | 88.8%     | 9.1%  |
| IL3          | single cell       | SCMDA        | 27.1          | 52.8%      | 72.9%      | 82.3%     | 11.2% |
| IL4          | single cell       | SCMDA        | 17.9          | 35.5%      | 68.8%      | 84.1%     | 9.6%  |
| IL5          | single cell       | SCMDA        | 17.8          | 34.7%      | 68.5%      | 84.3%     | 9.5%  |
| HL1          | single cell       | HighTemp MDA | 42.8          | 65.1%      | 79.2%      | 85.6%     | 10.1% |
| HL2          | single cell       | HighTemp MDA | 40.9          | 60.6%      | 76.0%      | 83.9%     | 10.4% |
| clone1       | single cell clone | -            | 29.5          | 82.1%      | 89.6%      | 90.5%     | 9.0%  |
| clone2       | single cell clone | -            | 33.6          | 84.9%      | 90.0%      | 90.6%     | 9.0%  |
| clone3       | single cell clone | -            | 27.6          | 80.0%      | 89.3%      | 90.5%     | 9.0%  |
| Bulk control | bulk              | -            | 43.9          | 88.1%      | 90.0%      | 90.5%     | 9.1%  |

**Supplementary Table 4.** *Pearson* correlation coefficients of observed and estimated major allele fractions\* in cell IL11 and IL12.

| Sample ID | $\lambda^{**} = 2000$    |                                | $\lambda = 10000$ (SCcaller default) |                                |
|-----------|--------------------------|--------------------------------|--------------------------------------|--------------------------------|
|           | 10 fold cross validation | leave-100-out cross validation | 10 fold cross validation             | leave-100-out cross validation |
| IL11      | 0.5                      | 0.55                           | 0.49                                 | 0.53                           |
| IL12      | 0.8                      | 0.84                           | 0.76                                 | 0.79                           |

\* The data were estimated on a randomly selected region, chr1:100,000,000-110,000,000.

\*\*  $\lambda$  denotes half of window width for smoothing (Methods).



**Supplementary Table 5.** Sanger sequencing validation of randomly selected somatic SNVs.

| Chr | Position  | Reference | Genotype in bulk cell population | Single cell genotype from Sanger | Called by SCcaller |                    |                    | Sanger sequencing  |                     |  |
|-----|-----------|-----------|----------------------------------|----------------------------------|--------------------|--------------------|--------------------|--------------------|---------------------|--|
|     |           |           |                                  |                                  | IL11, kindred cell | IL12, kindred cell | IL11, kindred cell | IL12, kindred cell | IL1C, kindred clone |  |
| 6   | 124299091 | T         | T/T                              | T/C                              | TRUE               | -                  | TRUE               | TRUE               | TRUE                |  |
| 9   | 5732840   | G         | G/G                              | G/T                              | TRUE               | TRUE               | TRUE               | TRUE               | TRUE                |  |
| 10  | 8488243   | T         | T/T                              | T/C                              | TRUE               | TRUE               | TRUE               | TRUE               | TRUE                |  |
| 9   | 4461559   | C         | C/C                              | C/A                              | TRUE               | -                  | TRUE               | TRUE               | TRUE                |  |
| 1   | 152685505 | C         | C/C                              | C/T                              | TRUE               | TRUE               | TRUE               | TRUE               | TRUE                |  |
| 12  | 14908833  | A         | A/A                              | A/G                              | TRUE               | TRUE               | TRUE               | TRUE               | TRUE                |  |
| 2   | 142675185 | T         | T/T                              | T/C                              | TRUE               | -                  | TRUE               | TRUE               | TRUE                |  |
| 4   | 132380455 | T         | T/T                              | T/C                              | -                  | TRUE               | TRUE               | TRUE               | TRUE                |  |
| 8   | 112315076 | A         | A/A                              | A/C                              | -                  | TRUE               | TRUE               | TRUE               | TRUE                |  |
| 5   | 158512199 | G         | G/G                              | G/A                              | -                  | TRUE               | TRUE               | TRUE               | TRUE                |  |
| 1   | 77255928  | G         | G/G                              | G/A                              | -                  | TRUE               | TRUE               | TRUE               | FALSE               |  |
| 2   | 115020724 | A         | A/A                              | A/G                              | TRUE               | TRUE               | TRUE               | TRUE               | FALSE               |  |
| 6   | 136645743 | T         | T/T                              | T/G                              | TRUE               | -                  | TRUE               | TRUE               | FALSE               |  |
| 7   | 76872746  | C         | C/C                              | C/A                              | TRUE               | TRUE               | TRUE               | TRUE               | FALSE               |  |
| 20  | 60057506  | G         | G/G                              | G/T                              | TRUE               | -                  | TRUE               | TRUE               | FALSE               |  |
| 21  | 28506056  | C         | C/C                              | C/A                              | TRUE               | -                  | TRUE               | TRUE               | FALSE               |  |

164 **References**

- 165 1 Gundry, M., Li, W., Maqbool, S. B. & Vijg, J. Direct, genome-wide assessment of  
166 DNA mutations in single cells. *Nucleic acids research* **40**, 2032-2040,  
167 doi:10.1093/nar/gkr949 (2012).
- 168 2 Hosono, S. *et al.* Unbiased whole-genome amplification directly from clinical  
169 samples. *Genome research* **13**, 954-964, doi:10.1101/gr.816903 (2003).
- 170 3 Cibulskis, K. *et al.* Sensitive detection of somatic point mutations in impure and  
171 heterogeneous cancer samples. *Nature biotechnology* **31**, 213-219,  
172 doi:10.1038/nbt.2514 (2013).
- 173 4 Koboldt, D. C. *et al.* VarScan 2: somatic mutation and copy number alteration  
174 discovery in cancer by exome sequencing. *Genome research* **22**, 568-576,  
175 doi:10.1101/gr.129684.111 (2012).
- 176 5 Zafar, H., Wang, Y., Nakhleh, L., Navin, N. & Chen, K. Monovar: single-nucleotide  
177 variant detection in single cells. *Nature methods*, doi:10.1038/nmeth.3835 (2016).
- 178 6 DePristo, M. A. *et al.* A framework for variation discovery and genotyping using  
179 next-generation DNA sequencing data. *Nature genetics* **43**, 491-498,  
180 doi:10.1038/ng.806 (2011).
- 181 7 Auton, A. *et al.* A global reference for human genetic variation. *Nature* **526**, 68-74,  
182 doi:10.1038/nature15393 (2015).
- 183 8 Hazen, J. L. *et al.* The Complete Genome Sequences, Unique Mutational Spectra,  
184 and Developmental Potency of Adult Neurons Revealed by Cloning. *Neuron* **89**,  
185 1223-1236, doi:10.1016/j.neuron.2016.02.004 (2016).
- 186 9 Zong, C., Lu, S., Chapman, A. R. & Xie, X. S. Genome-wide detection of  
187 single-nucleotide and copy-number variations of a single human cell. *Science*  
188 (*New York, N.Y.*) **338**, 1622-1626, doi:10.1126/science.1229164 (2012).
- 189
