# Supplementary material
Source: PubMed Central journal article supplement (PMC5408311)
Supplement: NIHMS855609-supplement-3.pdf [file NIHMS855609-supplement-3.pdf]

# 1 **Single-Cell Multiple Displacement Amplification (SCMDA) Protocol**

2  
3 Xiao Dong<sup>1\*</sup>, Lei Zhang<sup>1\*</sup>, Brandon Milholland<sup>1\*</sup>, Moonsook Lee<sup>1</sup>, Alexander Y. Maslov<sup>1</sup>,  
4 Tao Wang<sup>2</sup> and Jan Vijg<sup>1,3</sup>

5  
6 <sup>1</sup>Department of Genetics, <sup>2</sup>Department of Epidemiology & Population Health,  
7 <sup>3</sup>Department of Ophthalmology & Visual Sciences, Albert Einstein College of Medicine.

8  
9 \*These authors contributed equally to this work.

10 Correspondence should be addressed to Jan Vijg (jan.vijg@einstein.yu.edu).

## 11 12 **Reagents**

13 PBS, Ph7.4 1x (Gibco, Cat No. 10010-023)  
14 Exo-resistant random primers (500  $\mu$ M, Thermo Scientific Cat No. SO108)  
15 KOH[2N] (G-Biosciences Cat No. R008)  
16 DTT (REPLI-g Ultrafast Mini Kit, Qiagen, Cat No. 150035)  
17 EDTA (Fluka Analytical, REF 03690-100ml)  
18 HCl[2N] (Fisher Scientific, SA431-500)  
19 Tris-HCl solution (1M, pH7.5, Fisher BioReagent)  
20 MDA reaction buffer (REPLI-g Ultrafast Mini Kit, Qiagen, Cat No. 150035)  
21 Phi29 polymerase (REPLI-g Ultrafast Mini Kit, Qiagen, Cat No. 150035)  
22 AMPureXP-beads (Beckman Coulter, REF A63881)  
23 Ethanol 200 proof (Decon Laboratories)  
24 Nuclease-free water  
25 Qubit High Sensitivity dsDNA Kit (Invitrogen, REF Q32854)  
26 Agarose (Sigma)  
27 TrackIt 1Kb DNA Ladder (Invitrogen, Cat No. 10488085)  
28 TBE (10X, Fisher Scientific)  
29 Fast Sybr green master mix (Applied Biosystems, REF 4385612)  
30 Locus-specific primer (Supplementary Table 2; from IDT, 1  $\mu$ M)

## 31 32 **Equipment**

33 0.2-ml PCR tubes  
34 Mini centrifuge (Benchmark)  
35 PCR workstation (CBS Scientific, Mode P-036-02)  
36 PCR machine (Bio-Rad)  
37 DynaMag-2 magnet (Invitrogen)  
38 Qubit Fluorometer (Thermo Scientific)  
39 Qubit tube (Molecular Probed by Life, Q32856)

- 40 Agarose gel electrophoresis unit (Thermo Scientific)
- 41 FAS Digi Gel Imaging System (Bulldog Bio)
- 42 96-well plate (Applied Biosystems)
- 43 Optical Adhesive Covers (Applied Biosystems, REF 4360954)
- 44 Centrifuge (Eppendorf, 5430R)
- 45 qPCR machine (Applied Biosystems)

46

#### 47 **Procedure**

##### 48 **1. Single cell preparation:**

- 49 1) Isolate single cells (multiple single cell isolation methods are available, for example,
- 50 the CellRaft system, which was used here) and deposit into 0.2-ml PCR tubes
- 51 containing 2.5  $\mu$ l PBS.
- 52 2) Immediately place the tubes on dry ice and store at  $-80^{\circ}\text{C}$ .

53

##### 54 **2. Whole genome amplification:**

55 Carry out the following Step 1) to 4) in a PCR workstation.

- 56 1) Add 1  $\mu$ l exo-resistant random primers and 3  $\mu$ l lysis buffer containing 400 mM KOH,
- 57 100 mM DTT, 10 mM EDTA solution, into the PCR tube containing a single cell.
- 58 2) Flick the mixture several times, spin down quickly and keep it on ice for 10 min.
- 59 3) Add 3  $\mu$ l stop buffer containing 400 mM HCl and 600 mM Tris-HCl solution (1 M, pH7.5)
- 60 to neutralize the lysis buffer. Keep it on ice for 2 min.
- 61 4) Add 32  $\mu$ l of master mix containing 30  $\mu$ l MDA reaction buffer and 2  $\mu$ l Phi29
- 62 polymerase. Mix by pipetting gently.
- 63 5) Incubate at  $30^{\circ}\text{C}$  for 1.5 hr and  $65^{\circ}\text{C}$  for 3 min.

64

##### 65 **3. Amplified product purification:**

- 66 1) Purify amplified product with 75.6  $\mu$ l AMPureXP-beads and mix it by pipetting.
- 67 2) Leave the mixture at room temperature for 5 min and put it on a magnetic separator
- 68 until the solution is clear.
- 69 3) Remove the clear liquid by pipetting and wash beads twice with fresh 80% ethanol.
- 70 4) Open lid of the tube to air-dry beads for about 5 min. (Avoid beads cracking)
- 71 5) Take out the tube from magnetic separator and elute beads using 32  $\mu$ l nuclease-free
- 72 water.
- 73 6) Put back the tube to magnetic separator and keep it at room temperature for 5 min
- 74 until the solution is clear and a pellet is formed again.
- 75 7) Transfer 30  $\mu$ l clear liquid from the tube to a clean tube.
- 76 8) Store the purified product at  $4^{\circ}\text{C}$  for short-term storage or  $-20^{\circ}\text{C}$  for long-term storage.

77

##### 78 **4. Concentration and size measurement:**

- 79 1) Dilute the purified product 10-20 times and quantify the samples using Qubit. Usually,  
80 the yield of the purified product is 10-12 µg.  
81 2) Check the product size by agarose gel electrophoresis. The following conditions are  
82 recommended: 1.0% agarose gel; 1.0% TBE solution; 100V for 40 min. A bright band  
83 (with a little smear) over 10 kb in a gel picture is desirable.  
84

85 **5. Estimation of amplification uniformity:**

- 86 1) Dilute the purified product and unamplified genomic DNA as a control to 1 ng/µl using  
87 nuclease-free water.  
88 2) Prepare 96-well plate and the PCR mixture for each well including 5 µl Fast Sybr green  
89 master mix, 1 µl locus-specific primers, 2 µl nuclease-free water and 2 µl diluted DNA.  
90 3) Seal the plate and spin down.  
91 4) Incubate under the following qPCR program: 95°C for 20s, thermocycling (40 cycles)  
92 at 95°C for 3 s, and 60°C for 30 s.  
93 5) Calculate the relative uniformity values (RUVs) for 8 loci (equation (1) in  
94 Supplementary Note).  
95 6) Select the samples with RUV values for at least 6 of the 8 loci of between 0.25-4 for  
96 library construction.  
97  
98
